# **KRAS overexpression independent of RAS mutations confers an adverse prognosis in cytogenetically normal acute myeloid leukemia**

**Jing-Dong Zhou<sup>1,3,\*</sup>, Dong-Ming Yao<sup>2,3,\*</sup>, Xi-Xi Li<sup>1,3,\*</sup>, Ting-Juan Zhang<sup>1,3</sup>, Wei Zhang<sup>1,3</sup>, Ji-Chun Ma<sup>2,3</sup>, Hong Guo<sup>2,3</sup>, Zhao-Qun Deng<sup>2,3</sup>, Jiang Lin<sup>2,3</sup> and Jun Qian<sup>1,3</sup>**

<sup>1</sup>Department of Hematology, Affiliated People's Hospital of Jiangsu University, Zhenjiang, Jiangsu, People's Republic of China

<sup>2</sup>Laboratory Center, Affiliated People's Hospital of Jiangsu University, Zhenjiang, Jiangsu, People's Republic of China

<sup>3</sup>The Key Laboratory of Precision Diagnosis and Treatment of Zhenjiang City, Zhenjiang, Jiangsu, People's Republic of China

\*These authors have contributed equally to this work

**Correspondence to:** Jun Qian, **email:** qianjun0007@hotmail.com  
Jiang Lin, **email:** linjiangmail@sina.com

**Keywords:** RAS, expression, mutation, prognosis, acute myeloid leukemia

**Received:** April 25, 2017

**Accepted:** June 29, 2017

**Published:** August 02, 2017

**Copyright:** Zhou et al. This is an open-access article distributed under the terms of the Creative Commons Attribution License 3.0 (CC BY 3.0), which permits unrestricted use, distribution, and reproduction in any medium, provided the original author and source are credited.

## **ABSTRACT**

**The prognostic value of RAS mutations has been systematically investigated in acute myeloid leukemia (AML). However, clinical significance of RAS expressions in AML remains poorly determined. To explore the clinical significance, we analyzed KRAS and NRAS expressions in 143 de novo AML patients by real-time quantitative PCR. KRAS and NRAS expressions were significantly up-regulated in AML patients. KRAS and NRAS mutations were identified in 4% (6/143) and 8% (12/143) of these patients, respectively. However, no significant association was observed between RAS mutations and expressions. High KRAS expression was associated with older age, higher white blood cells, and a tendency of higher platelets, whereas high NRAS expression was only correlated with older age. Complete remission (CR) rate and overall survival of AML patients were adversely affected by KRAS overexpression, but not NRAS overexpression. Multivariate analysis revealed that KRAS acted as an independent prognostic predictor in cytogenetically normal AML (CN-AML). Moreover, the prognostic value of KRAS expression was validated using the published data from Gene Expression Omnibus datasets. In the follow-up patients, KRAS expression rather than NRAS expression in CR time tended to decrease compared to newly diagnosis time, and both KRAS and NRAS expressions were significantly increased when in relapse time. Our findings revealed that RAS overexpression and mutations were common events in AML with potential therapeutic target value. KRAS overexpression independent of RAS mutations conferred an adverse prognosis in CN-AML.**

## **INTRODUCTION**

Acute myeloid leukemia (AML) is an aggressive hematopoietic malignancy associated with severe morbidity and poor clinical outcome [1, 2]. Cytogenetic abnormalities of AML assessed at diagnosis are generally recognized as the most valuable independent prognostic

factors in AML, allowing the classification of AML into favorable, intermediate, and poor prognostic groups [2, 3]. However, in approximately 50% of AML patients, no cytogenetic abnormality is detectable at the diagnosis time, often called as cytogenetically normal AML (CN-AML) [1, 2]. Such patients are in an intermediate-risk prognostic category, but among them are subgroups of patients who

have molecular markers associated with either a favorable prognosis or an unfavorable prognosis [2–4]. Over the past decades, several gene mutations, such as *CEBPA*, *NPM1*, *FLT3-ITD*, *C-KIT*, *DNMT3A*, and *IDH1/2*, and changes in gene expression, such as overexpression of *BAALC*, *ERG*, *EVII*, and *MNI*, have been discovered to strongly affect clinical outcome of CN-AML patients [4]. Accordingly, further refinement of relevant molecular alterations in different AML subgroups might eventually result in more individual treatment approaches and potentially improve outcome.

*RAS* proto-oncogenes, including *KRAS*, *NRAS*, and *HRAS*, encode a membrane-localized G protein of 21 kDa regulate the growth and differentiation of many cell types [5–7]. *RAS* proteins are located on the inner surface of the plasma membrane and act as molecular switches that transduce extracellular signals to the nucleus [5–7]. It is inactive when bound to GDP and active when bound to GTP [5–7]. *RAS* activation caused by its mutation giving rise to an abnormal protein resistant to GTP hydrolysis by GTPase leads to a constitutively active GTP-bound protein that stimulates a critical network of signal transduction pathways that result in cellular proliferation, survival, and differentiation [5–7]. *RAS* mutations at codons 12, 13, and 61 are common events in human cancers, and are frequently detected in AML with their clinical relevance been systematically determined [5–7]. Herein, we investigated *RAS* expressions and their clinical significances in *de novo* AML patients.

## RESULTS

### RAS expressions and mutations in AML

We first examined *KRAS* and *NRAS* expressions in controls and newly diagnosed AML patients. *KRAS* expression in AML patients (median 1.024) was significantly up-regulated than controls (median 0.319) ( $P=0.008$ , Figure 1A). By the cut-off value (defined as mean+2SD in controls), *KRAS* overexpression was identified in 35/143 (24%) of AML patients. Moreover, increased *NRAS* expression was also found in AML patients compared with controls (median 4.896 vs 2.838) ( $P=0.044$ , Figure 1B), and identified in 37/143 (26%) of AML patients based on the cut-off value (defined as mean+2SD in controls). Moreover, *KRAS* expression was positively correlated with *NRAS* expression in AML patients ( $R=0.605$ ,  $P<0.001$ ).

*KRAS* and *NRAS* mutations were scanned in all patients. *KRAS* mutation was found in 4% (6/143) patients, whereas 8% (12/143) patients harbored *NRAS* mutation. Notably, no significant differences was observed regarding *KRAS* (median 2.759 vs 1.017,  $P=0.330$ ) and *NRAS* (median 16.148 vs 4.738,  $P=0.355$ ) expression in patients with and without *KRAS* mutation. In addition, patients with and without *NRAS* mutation also showed similar level of *KRAS* (median 1.274 vs 1.017,  $P=0.350$ ) and *NRAS* (median 5.055 vs 4.896,  $P=0.884$ ) expression. All these results suggested that *RAS* expressions were not correlated with *RAS* mutations in AML.

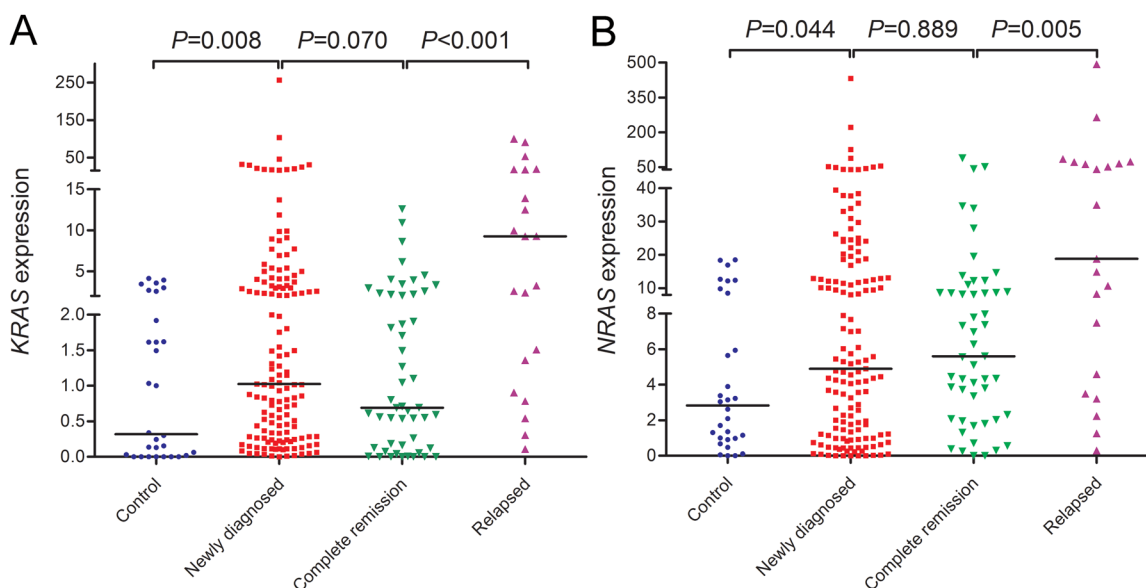

**Figure 1: *RAS* expressions in controls and AML patients including newly diagnosed AML, AML at complete remission time, and relapsed AML. (A) *KRAS* expression. (B) *NRAS* expression.**

## Clinical and laboratory characteristics of AML

Previous study has revealed the clinical significance of *RAS* mutations in *de novo* AML patients [8]. Herein, we further investigated the correlation of *RAS* expressions with clinico-pathologic features. As is shown in Table 1, *KRAS* high-expressed (*KRAS*<sup>high</sup>) patients were associated with older age ( $P=0.034$ ), higher white blood cells ( $P=0.007$ ), and a tendency of higher platelets ( $P=0.057$ ), whereas *NRAS* high-expressed (*NRAS*<sup>high</sup>) patients were only correlated with older age ( $P=0.009$ ). Additionally, only *KRAS* but not *NRAS* expression showed significant differences in the distribution of karyotypes, and *KRAS* overexpression showed lower frequency in t(15;17) subtypes ( $P=0.048$ ). Among gene mutations, *KRAS* overexpression was correlated with *U2AF1* mutation ( $P=0.033$ ), whereas *NRAS* overexpression might be associated with *IDH1/2* mutations ( $P=0.059$ ).

## Prognostic value of RAS expressions and mutations in AML

Follow-up data was available in 135 AML patients after receiving induction chemotherapy (median: 10 months, 95% CI: 6.374-123.626). In whole-cohort AML, *KRAS*<sup>high</sup> patients showed had an obvious tendency of lower complete remission (CR) rate, whereas *NRAS* did not (Table 1). Both *KRAS* and *NRAS* expressions were not correlated with CR rate among non-acute promyelocytic leukemia (APL) patients [43% (34/79, *KRAS*<sup>low</sup>) vs 29% (10/34, *KRAS*<sup>low</sup>),  $P=0.210$  and 41% (32/79, *NRAS*<sup>low</sup>) vs 35% (12/34, *NRAS*<sup>high</sup>),  $P=0.677$ ]. Among CN-AML, *KRAS*<sup>high</sup> and *NRAS*<sup>high</sup> patients also presented an obvious tendency of lower CR rate [47% (20/43, *KRAS*<sup>low</sup>) vs 25% (4/16, *KRAS*<sup>high</sup>),  $P=0.078$  and 47% (20/43, *NRAS*<sup>low</sup>) vs 25% (4/16, *NRAS*<sup>high</sup>),  $P=0.078$ ].

Survival analyses were further performed in 135 AML patients. Kaplan-Meier analyses demonstrated that *KRAS*<sup>high</sup> was associated with shorter overall survival (OS) time among whole-cohort AML, non-APL AML, and CN-AML patients (Figure 2A, 2B and 2C). However, *NRAS*<sup>high</sup> was not correlated with OS time in whole-cohort AML and non-APL AML (Figure 2D and 2E), but had an obvious tendency of shorter OS time in CN-AML (Figure 2F). Next, we classified patients into three groups (both low vs either high vs both high) regarding *RAS* expressions, and showed in Figure 2G, 2H and 2I (whole-cohort AML, non-APL AML, and CN-AML). Cox regression analyses were further performed to determine the prognostic impact of *RAS* expressions in AML, and showed that *KRAS* was an independent prognostic biomarker in CN-AML (Table 2) but not in whole-cohort AML and non-APL AML patients (data not shown).

The published data from two independent cohorts of CN-AML patients available in Gene Expression Omnibus (GEO) databases were set as the independent validation

cohort. Through the online tools GenomicScape, *KRAS* overexpression was significantly related to shorter OS time (Figure 3A and 3B), whereas *NRAS* was not found (Figure 3C and 3D).

Lastly, we further analyzed the impact of *RAS* abnormalities (overexpression and mutation) on prognosis. We divided patients into groups regarding *RAS* expressions and mutations including *KRAS* normal (without mutation and overexpression) vs *KRAS* abnormal (with mutation or overexpression), *NRAS* normal vs *NRAS* abnormal, and *RAS* normal vs *RAS* abnormal. All the results were presented in Figure 4.

## RAS expressions in the surveillance of AML

To observe the dynamic change of *RAS* expressions in AML patients of different clinical stages, we further detected *RAS* expressions in 51 patients who achieved CR after induction therapy and 21 relapsed patients. As was shown in Figure 1A and 1B, *KRAS* expression rather than *NRAS* expression in CR time tended to decrease compared to newly diagnosis time, and both *KRAS* and *NRAS* expressions were significantly increased when in relapse time.

## DISCUSSION

The signal switch molecules RAS proteins play crucial roles in relaying growth-promoting signals from cell surface receptors [5–7]. Oncogenic point mutations of *RAS* are identified in ~30% of human cancers especially in pancreatic cancer, lung cancer, and colon cancer [5–7]. Significantly, *RAS* mutations, usually in *KRAS* and *NRAS*, are also frequent events in myeloid malignancies, and have been detected in 3% to 40% of myelodysplastic syndrome (MDS) and AML [5–7]. In this study, *KRAS* and *NRAS* mutations were identified in 4% and 8% AML patients, which showed lower percentage compared to previous study. Possible reasons were that we only detected hot-spot mutations in *RAS*, or the differences in ethnics. Moreover, the prognostic value of *RAS* mutations in AML remains controversial. Several investigators reported *RAS* mutations emerged as significant predictors for improved clinical outcome [9]. Meanwhile, *NRAS* mutation was associated with adverse prognosis and increased risk of leukemia transformation in MDS [10]. Conversely, the opponents hold the view that *RAS* mutations were associated with distinct cytogenetic subgroups, usually M4, but not correlated with prognosis in AML patients [11, 12]. Our previous study also analyzed the clinical significance of *RAS* mutations in *de novo* AML, but did not have an independent effect on prognosis [8]. In addition, we also did not observe the impact of *FLT3*, *NPM1* and *CEBPA* mutations on prognosis, which might be due to the small size of patients with mutations in our cohort.

In the present study, we mainly focused on *RAS* expressions in AML, and found that both *KRAS* and *NRAS*

**Table 1: Correlation analyses of *KRAS* and *NRAS* expressions with clinic-pathologic features in AML patients**

| Patient's parameters       | <i>KRAS</i> expression |                  |          | <i>NRAS</i> expression |                  |          |
|----------------------------|------------------------|------------------|----------|------------------------|------------------|----------|
|                            | Low (n=108)            | High (n=35)      | <i>P</i> | Low (n=106)            | High (n=37)      | <i>P</i> |
| Sex, male/female           | 62/46                  | 25/10            | 0.166    | 64/42                  | 23/14            | 1.000    |
| Age, median (range)        | 54 (15-87)             | 60 (10-93)       | 0.034    | 54 (10-93)             | 63 (17-87)       | 0.009    |
| WBC, median (range)        | 13.2 (0.3-528.0)       | 34.5 (0.8-197.7) | 0.007    | 16.6 (0.3-528.0)       | 23.0 (1.2-135.4) | 0.543    |
| HB, median (range)         | 75 (34-144)            | 82 (34-135)      | 0.844    | 77 (34-138)            | 76 (34-144)      | 0.863    |
| PLT, median (range)        | 32 (3-415)             | 43 (9-399)       | 0.057    | 32 (3-415)             | 46 (9-399)       | 0.181    |
| BM blasts, median (range)  | 47.0 (1.0*-97.5)       | 38.8 (21.5-92.0) | 0.983    | 44.8 (1.0*-97.5)       | 48.5 (6.5*-92.0) | 0.855    |
| Karyotypic classifications |                        |                  | 0.230    |                        |                  | 0.399    |
| Favorable                  | 34 (31.5%)             | 6 (17.1%)        |          | 31 (29.2%)             | 8 (21.6%)        |          |
| Intermediate               | 60 (55.6%)             | 23 (65.7%)       |          | 62 (58.5%)             | 21 (56.8%)       |          |
| Poor                       | 12 (11.1%)             | 4 (11.4%)        |          | 11 (10.4%)             | 6 (16.2%)        |          |
| No data                    | 2 (1.9%)               | 2 (5.7%)         |          | 2 (1.9%)               | 2 (5.4%)         |          |
| Karyotypes                 |                        |                  | 0.048    |                        |                  | 0.250    |
| Normal                     | 46 (42.6%)             | 16 (45.7%)       |          | 46 (43.4%)             | 16 (43.2%)       |          |
| t(8;21)                    | 10 (9.3%)              | 3 (8.6%)         |          | 8 (7.5%)               | 5 (13.5%)        |          |
| inv(16)                    | 0 (0%)                 | 1 (2.9%)         |          | 1 (0.9%)               | 0 (0%)           |          |
| t(15;17)                   | 24 (22.2%)             | 1 (2.9%)         |          | 22 (20.8%)             | 3 (8.1%)         |          |
| +8                         | 3 (2.8%)               | 2 (5.7%)         |          | 5 (4.7%)               | 0 (0%)           |          |
| t(9;22)                    | 0 (0%)                 | 1 (2.9%)         |          | 0 (0%)                 | 1 (2.7%)         |          |
| -5/5q-                     | 2 (1.9%)               | 0 (0%)           |          | 1 (0.9%)               | 1 (2.7%)         |          |
| -7/7q-                     | 1 (0.9%)               | 0 (0%)           |          | 1 (0.9%)               | 0 (0%)           |          |
| Complex                    | 10 (9.3%)              | 4 (11.4%)        |          | 9 (8.5%)               | 5 (13.5%)        |          |
| Others                     | 10 (9.3%)              | 5 (14.3%)        |          | 11 (10.4%)             | 4 (10.8%)        |          |
| No data                    | 2 (1.9%)               | 2 (5.7%)         |          | 2 (1.9%)               | 2 (5.4%)         |          |
| Gene mutations             |                        |                  |          |                        |                  |          |
| <i>KRAS</i> (+/-)          | 5/103                  | 1/34             | 1.000    | 3/103                  | 3/34             | 0.339    |
| <i>NRAS</i> (+/-)          | 7/101                  | 5/30             | 0.167    | 9/97                   | 3/34             | 1.000    |
| Double <i>CEBPA</i> (+/-)  | 4/88                   | 0/26             | 0.575    | 4/85                   | 0/29             | 0.571    |
| <i>NPM1</i> (+/-)          | 8/84                   | 3/23             | 0.705    | 7/82                   | 4/25             | 0.461    |
| <i>FLT3</i> -ITD (+/-)     | 12/80                  | 2/24             | 0.526    | 11/78                  | 3/26             | 1.000    |
| <i>C-KIT</i> (+/-)         | 5/87                   | 1/25             | 1.000    | 4/85                   | 2/27             | 0.635    |
| <i>IDH1</i> (+/-)          | 1/91                   | 1/25             | 0.394    | 0/89                   | 2/27             | 0.059    |
| <i>IDH2</i> (+/-)          | 1/91                   | 1/25             | 0.394    | 0/89                   | 2/27             | 0.059    |
| <i>DNMT3A</i> (+/-)        | 5/87                   | 3/23             | 0.372    | 7/82                   | 1/28             | 0.677    |
| <i>U2AF1</i> (+/-)         | 1/91                   | 3/23             | 0.033    | 3/86                   | 1/28             | 1.000    |
| <i>SRSF2</i> (+/-)         | 2/90                   | 1/25             | 0.530    | 2/87                   | 1/28             | 1.000    |
| CR (+/-)                   | 51/49 (51.0%)          | 11/24 (31.4%)    | 0.051    | 48/50 (49.0%)          | 14/23 (37.8%)    | 0.333    |

AML, acute myeloid leukemia; WBC, white blood cells; HB, hemoglobin; PLT, platelets; BM, bone marrow; CR, complete remission. \*, AML patients less than 20% BM blasts often with typical cytogenetics such as t(15;17).

overexpression were common events more frequently than *RAS* mutations in *de novo* AML patients. Notably, our study did not find significant association of *RAS* overexpression with *RAS* mutations. Similarly, a recent report also showed *KRAS* mutation did not correlate with mRNA expression [13]. These results suggested that *RAS* overexpression and mutations were independent events

contributing to the pathogenesis of AML. Moreover, *RAS* overexpression rather than *RAS* mutations might play more critical roles in leukemogenesis. The underlying mechanism during leukemogenesis caused by *RAS* overexpression needed further studies. Interestingly, we observed that *KRAS* overexpression was associated with *U2AF1* mutations, whereas *NRAS* overexpression was

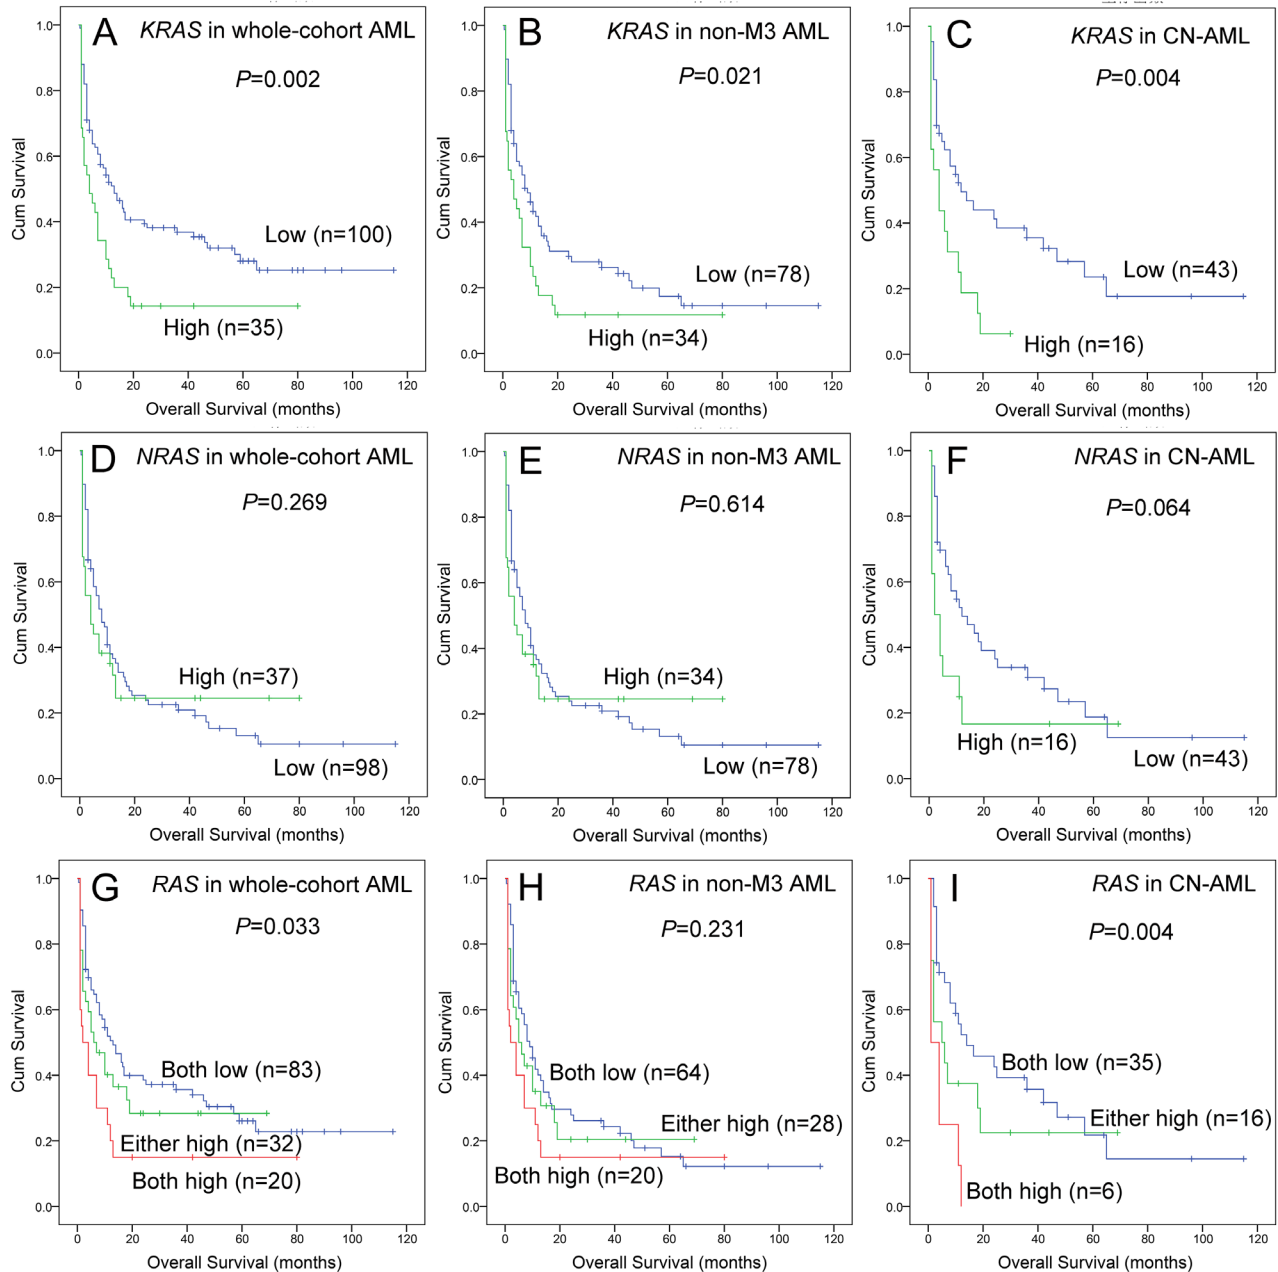

**Figure 2: The impact of *RAS* expressions on overall survival in AML patients. (A, B and C) For *KRAS* expression in whole-cohort AML, non-APL AML, and CN-AML patients. (D, E and F) For *NRAS* expression in whole-cohort AML, non-APL AML, and CN-AML patients. (G, H and I) For *RAS* expression in whole-cohort AML, non-APL AML, and CN-AML patients, “both low” indicated neither *KRAS* nor *NRAS* overexpression, “either high” indicated either *KRAS* or *NRAS* overexpression, “both high” indicated both *KRAS* and *NRAS* overexpression.**



**Table 2: Univariate and multivariate analyses of prognostic factors for overall survival in cytogenetically normal AML patients**

|                            | Univariate analysis   |         | Multivariate analysis |         |
|----------------------------|-----------------------|---------|-----------------------|---------|
|                            | Hazard ratio (95% CI) | P value | Hazard ratio (95% CI) | P value |
| <i>KRAS</i> expression     | 2.443 (1.277-4.675)   | 0.007   | 2.464 (1.113-5.453)   | 0.026   |
| <i>NRAS</i> expression     | 1.798 (0.937-3.452)   | 0.078   | 1.805 (0.467-2.522)   | 0.849   |
| Age                        | 2.125 (1.166-3.874)   | 0.014   | 1.812 (0.895-3.670)   | 0.099   |
| WBC                        | 2.618 (1.431-4.788)   | 0.002   | 1.985 (1.001-3.938)   | 0.050   |
| <i>CEBPA</i> * mutations   | 1.013 (0.241-4.262)   | 0.986   |                       |         |
| <i>NPM1</i> mutations      | 0.679 (0.240-1.927)   | 0.467   |                       |         |
| <i>FLT3</i> -ITD mutations | 0.607 (0.211-1.742)   | 0.353   |                       |         |
| <i>C-KIT</i> mutations     | 0.734 (0.100-5.402)   | 0.761   |                       |         |
| <i>KRAS</i> mutations      | 5.323 (1.534-18.476)  | 0.008   | 8.702 (1.794-42.209)  | 0.007   |
| <i>NRAS</i> mutations      | 1.609 (0.673-3.850)   | 0.285   |                       |         |
| <i>IDH1</i> mutations      | 8.565 (1.759-41.710)  | 0.008   | 6.609 (1.279-34.135)  | 0.024   |
| <i>IDH2</i> mutations      | 5.707 (0.714-45.644)  | 0.101   |                       |         |
| <i>DNMT3A</i> mutations    | 1.412 (0.545-3.656)   | 0.477   |                       |         |
| <i>U2AF1</i> mutations     | 2.179 (0.290-16.342)  | 0.449   |                       |         |
| <i>SRSF2</i> mutations     | 2.915 (0.669-12.705)  | 0.154   |                       |         |

WBC, white blood cells. Variables including age ( $\leq 60$  vs.  $> 60$  years), WBC ( $\geq 30 \times 10^9$  vs.  $< 30 \times 10^9$  /L), *RAS* expression (lower vs. higher), and gene mutations (mutant vs. wild-type). Multivariate analysis includes variables with  $P < 0.100$  in univariate analysis. \*, double *CEBPA* mutations.

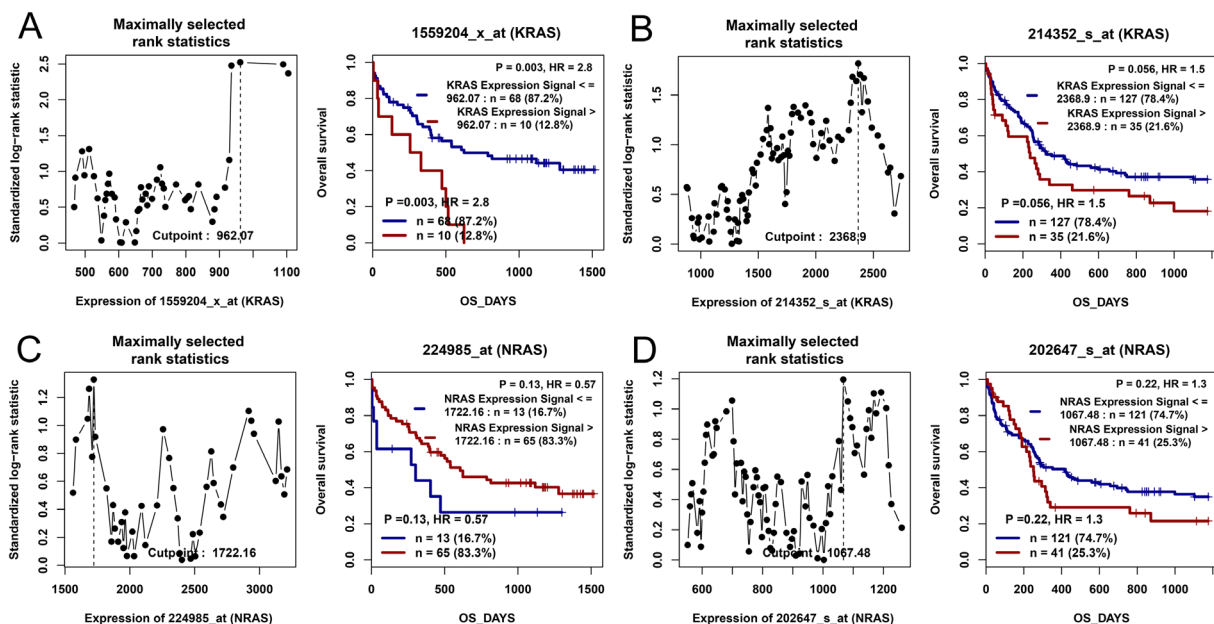

**Figure 3: The impact of *RAS* expressions on overall survival in CN-AML patients by bioinformatics analysis.** Two independent cohorts of 78 and 162 CN-AML patients were obtained from Gene Expression Omnibus data (<http://www.ncbi.nlm.nih.gov/geo/>; accession number GSE12417). Survival analysis was performed through the online web tool Genomicscape (<http://genomicscape.com/microarray/survival.php>). (A) For *KRAS* in a cohort of 78 CN-AML patients. (B) For *KRAS* in a cohort of 162 CN-AML patients. (C) For *NRAS* in a cohort of 78 CN-AML patients. (D) For *NRAS* in a cohort of 162 CN-AML patients.

associated with *IDH1/2* mutations. As is well known, RNA splicing factor gene *U2AF1* and isocitrate dehydrogenase gene *IDH1/2* mutations are recurrent in *de novo* AML especially in CN-AML, and have a prognostic impact on assessing treatment outcome [14, 15]. However, it was the first time to report the association of *RAS* overexpression with these gene mutations. No functional studies were found to verify our results. In addition, due to the limited cases of *RAS* mutations in our cohort, perspective studies

in a larger cohort of AML patients are required to confirm these findings, and further reveal the underlying molecular mechanism.

Importantly, our study revealed the impact of *RAS* expressions on clinical outcome of AML. Firstly, a negative effect of *KRAS* overexpression was observed among whole-cohort AML and CN-AML patients. The results indicated that *KRAS* activation may be associated with chemoresistance in the induction therapy of AML.

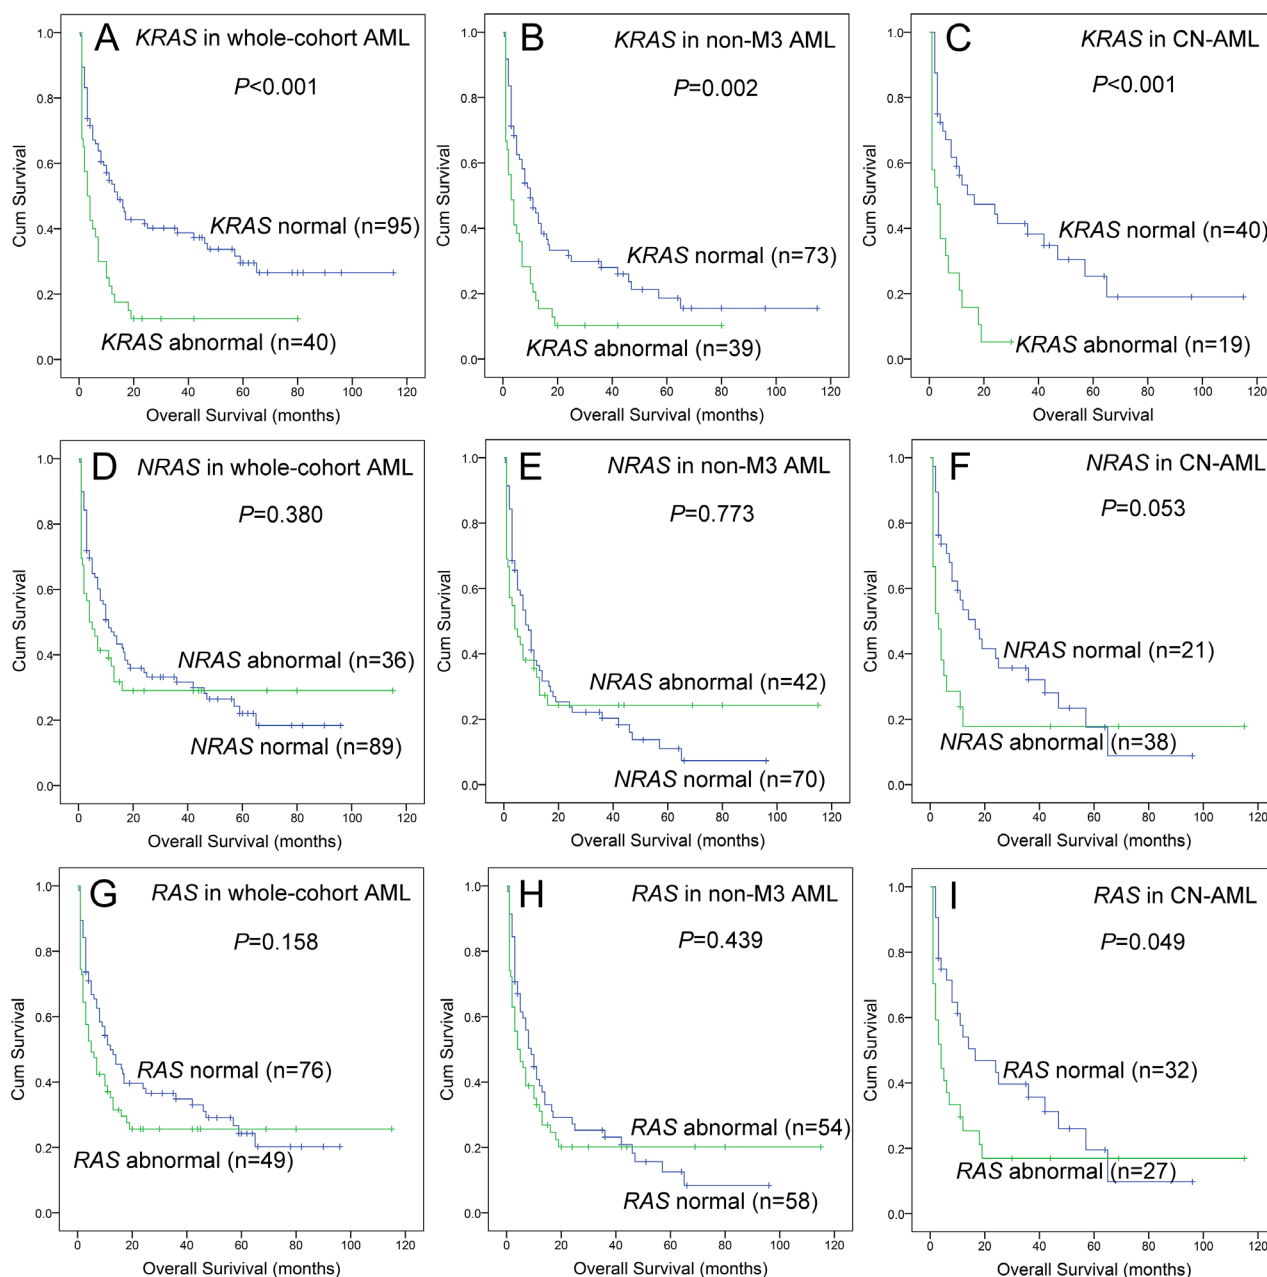

**Figure 4: The impact of *RAS* abnormalities on overall survival in AML patients.** (A, B and C) For *KRAS* abnormalities in whole-cohort AML, non-APL AML, and CN-AML patients. (D, E and F) For *NRAS* abnormalities in whole-cohort AML, non-APL AML, and CN-AML patients. (G, H and I) For *RAS* abnormalities in whole-cohort AML, non-APL AML, and CN-AML patients. “Abnormal” indicated gene with overexpression or mutation, whereas “normal” indicated gene without overexpression and mutation.

Although there were no functional studies to validate the hypothesis in AML, several investigations revealed the oncogenic role of *KRAS* abnormalities (overexpression or mutation) were associated with resistant to anticancer drug treatments phenomenally and/or mechanically [16–18]. Secondly, both our data and the published GEO databases showed that *KRAS* overexpression was a prognostically adverse predictor in CN-AML patients. More importantly, *KRAS* expression may increase the power in predicting prognosis when combined with other molecular alterations such as *NRAS* expression or *NRAS/KRAS* mutations. The prognostic value of *KRAS* expression has been determined in various cancers. For instance, Chen et al disclosed that *KRAS* overexpression predicted poor prognosis in patients with colorectal cancer [19]. Moreover, *RAS* expressions as an independent indicator of patient outcomes in lung cancer treated with bevacizumab plus chemotherapy [20]. Thirdly, we further found *RAS* expressions could be used as a biomarker for monitoring disease treatment and recurrence in AML. Collectively, these above results emphasized a more crucial role of *KRAS* from *RAS* family in the process of leukemogenesis, and could act as a potential therapeutic target for designing cancer gene therapy.

Taken together, our findings reveal that *RAS* overexpression and mutations are common events in AML with potential therapeutic target value. *KRAS* overexpression independent of *RAS* mutations confers an adverse prognosis in CN-AML.

## MATERIALS AND METHODS

### Patients and samples

This study was approved by the Institutional Review Board of the Affiliated People's Hospital of Jiangsu University. After written informed consents were obtained from all participants, bone marrow (BM) was collected from 143 *de novo* AML patients at newly diagnosis time, 51 AML patients at CR time, and 21 AML patients at relapse time. The diagnosis and classification of AML patients were established according to the 2008 World Health Organization (WHO) criteria. BM samples from 30 healthy donors were collected as controls. The separation of BM mononuclear cells (BMMNCs) was performed using Lymphocyte Separation Medium (TBD Sciences, Tianjin, China) and washed twice with PBS.

### Treatment regimen

All the AML patients received chemotherapy including induction therapy and subsequent consolidation treatment as reported in our previous literature [21, 22]. For patients with APL, induction therapy was oral all-trans retinoic acid (ATRA) together with daunorubicin in

combination with cytarabine, and maintenance therapy was oral mercaptopurine, oral methotrexate, and oral ATRA over two years. For non-APL patients, induction therapy was one or two courses of daunorubicin combined with cytarabine, whereas subsequent consolidation treatment included high-dose cytarabine, mitoxantrone combined with cytarabine, homoharringtonine together with cytarabine, and etoposide in combination with cytarabine.

### Cytogenetic analyses

Karyotypes were analyzed at the newly diagnosis time by conventional R-banding method and karyotype risk was classified according to reported previously [23].

### RNA isolation and reverse transcription

Total RNA was extracted from the BMMNCs using Trizol reagent (Invitrogen, Carlsbad, CA, USA). The synthesis of cDNA was performed by reverse transcription as reported [24].

### Real-time quantitative PCR

*KRAS* and *NRAS* expressions were detected by real-time quantitative PCR (RQ-PCR) using AceQ qPCR SYBR Green Master Mix (Vazyme Biotech Co., Piscataway, NJ, USA). The primers of *KRAS* and *NRAS* expressions were used as reported [25, 26]. PCR conditions were conducted at 95 °C for 5 min, followed by 40 cycles at 95 °C for 10 s, 60 °C for 30 s, 72 °C for 32 s, and 75 °C for 32 s. Housekeeping gene *ABL* was used to calculate the abundance of *KRAS* and *NRAS* mRNA. The detection of *ABL* expression was performed with primers as reported [27]. Both positive [K562 cell lines samples, cultured in RPMI 1640 medium containing 10% fetal calf serum (ExCell Bio, Shanghai, China)] and negative controls (ddH<sub>2</sub>O) were included in each assay. Relative *KRAS* and *NRAS* expressions levels were calculated using 2<sup>-ΔΔCT</sup> method.

### DNA extraction and gene mutation detection

Genomic DNA was isolated from BMMNCs using genomic DNA purification kit (Gentra, Minneapolis, MN, USA). The hot-spot mutations (codons 12, 13 and 61) of *KRAS* and *NRAS* were screened using high-resolution melting analysis (HRMA) as reported [8]. All positive samples were confirmed by DNA sequencing. The other gene mutations including *NP1*, *C-KIT*, *DNMT3A*, *IDH1*, *IDH2*, and *U2AF1* were also detected by HRMA [28–33], whereas *FLT3*-ITD and *CEBPA* mutations were examined by DNA sequencing (BGI Tech Solutions Co., Shanghai, China) [34, 35].



## Gene Expression Omnibus datasets

Two independent cohorts of CN-AML patients (78 and 162 patients) from GEO data (<http://www.ncbi.nlm.nih.gov/geo/>; accession number GSE12417) were applied to analyze the prognostic impact of *KRAS* and *NRAS* expressions using the online web tool Genomicscape (<http://genomicscape.com/microarray/survival.php>) [36, 37].

## Statistical analyses

Mann-Whitney's U test and Pearson Chi-square/Fisher exact test were employed to compare the difference of continuous and categorical variables between two groups. The relationship between *KRAS* expression and *NRAS* expression was analyzed by Spearman test. The impact of *KRAS* and *NRAS* expressions on prognosis was determined by Kaplan-Meier and Cox regression analyses. All the statistical analyses were performed through SPSS 20.0 software package. For all analyses, a two-tailed *P* value less than 0.05 was determined as statistically significant.

## Abbreviations

AML: acute myeloid leukemia; CR: complete remission; CN-AML: cytogenetically normal AML; GEO: Gene Expression Omnibus; MDS: myelodysplastic syndrome; BM: bone marrow; WHO: World Health Organization; BMMNCs: BM mononuclear cells; APL: acute promyelocytic leukemia; ATRA: all-trans retinoic acid; RQ-PCR: real-time quantitative PCR; HRMA: high-resolution melting analysis; OS: overall survival.

## Author contributions

Jun Qian and Jiang Lin conceived and designed the experiments; Jing-dong Zhou and Xi-xi Li performed the experiments; Dong-dong Yao, Ji-chun Ma, Hong Guo, and Zhao-qun Deng gave technical support; Jing-dong Zhou and Dong-ming Yao analyzed the data; Ting-juan Zhang and Wei Zhang contributed clinical data collection; Jing-dong Zhou wrote the paper.

## ACKNOWLEDGMENTS

This work was supported by National Natural Science foundation of China (81270630), Special Funds of "Ke Jiao Qiang Wei" Project of Jiangsu Province, 333 Project of Jiangsu Province (BRA2016131), Six Talent Peaks Project in Jiangsu Province (2015-WSN-115), Medical Innovation Team of Jiangsu Province (CXTDB2017002), Postgraduate Research & Practice Innovation Program of Jiangsu Province (KYCX17\_1821), China Postdoctoral Science Foundation funded project (2016M601748), Social Development Foundation of

Zhenjiang (SH2015058, SH2016045, SH2016046), Key Medical Talent Program of Zhenjiang City.

## CONFLICTS OF INTEREST

The authors stated that there are no conflicts of interest regarding the publication of this article.

## REFERENCES

1. Estey E, Döhner H. Acute myeloid leukaemia. *Lancet*. 2006; 368:1894-907.
2. Döhner H, Estey EH, Amadori S, Appelbaum FR, Büchner T, Burnett AK, Dombret H, Fenaux P, Grimwade D, Larson RA, Lo-Coco F, Naoe T, Niederwieser D, et al. Diagnosis and management of acute myeloid leukemia in adults: recommendations from an international expert panel, on behalf of the European LeukemiaNet. *Blood*. 2010; 115:453-74.
3. Mrózek K, Heerema NA, Bloomfield CD. Cytogenetics in acute leukemia. *Blood Rev*. 2004; 18:115-36.
4. Mrózek K, Marcucci G, Paschka P, Whitman SP, Bloomfield CD. Clinical relevance of mutations and gene-expression changes in adult acute myeloid leukemia with normal cytogenetics: are we ready for a prognostically prioritized molecular classification? *Blood*. 2007; 109:431-48.
5. Alvarado Y, Giles FJ. Ras as a therapeutic target in hematologic malignancies. *Expert Opin Emerg Drugs*. 2007; 12:271-84.
6. Le DT, Shannon KM. Ras processing as a therapeutic target in hematologic malignancies. *Curr Opin Hematol*. 2002; 9:308-15.
7. Braun BS, Shannon K. Targeting Ras in myeloid leukemias. *Clin Cancer Res*. 2008; 14:2249-52.
8. Yang X, Qian J, Sun A, Lin J, Xiao G, Yin J, Chen S, Wu D. RAS mutation analysis in a large cohort of Chinese patients with acute myeloid leukemia. *Clin Biochem*. 2013; 46:579-83.
9. Neubauer A, Dodge RK, George SL, Davey FR, Silver RT, Schiffer CA, Mayer RJ, Ball ED, Wurster-Hill D, Bloomfield CD. Prognostic importance of mutations in the ras proto-oncogenes in de novo acute myeloid leukemia. *Blood*. 1994; 83:1603-11.
10. Paquette RL, Landaw EM, Pierre RV, Kahan J, Lübbert M, Lazcano O, Isaac G, McCormick F, Koeffler HP. N-ras mutations are associated with poor prognosis and increased risk of leukemia in myelodysplastic syndrome. *Blood*. 1993; 82:590-9.
11. Radich JP, Kopecky KJ, Willman CL, Weick J, Head D, Appelbaum F, Collins SJ. N-ras mutations in adult de novo acute myelogenous leukemia: prevalence and clinical significance. *Blood*. 1990; 76:801-7.

12. Stirewalt DL, Kopecky KJ, Meshinchi S, Appelbaum FR, Slovak ML, Willman CL, Radich JP. FLT3, RAS, and TP53 mutations in elderly patients with acute myeloid leukemia. *Blood*. 2001; 97:3589-95. Erratum in: *Blood*. 2001; 98:924.
13. Pectasides D, Kotoula V, Papaxoinis G, Alexopoulou Z, Dervenis C, Samantas E, Papaparaskeva K, Charalambous E, Gkakou C, Agalianos C, Kalogeras KT, Pentheroudakis G, Fountzilias G. Expression patterns of growth and survival genes with prognostic implications in advanced pancreatic cancer. *Anticancer Res*. 2016; 36:6347-56.
14. Ohgami RS, Ma L, Merker JD, Gotlib JR, Schrijver I, Zehnder JL, Arber DA. Next-generation sequencing of acute myeloid leukemia identifies the significance of TP53, U2AF1, ASXL1, and TET2 mutations. *Mod Pathol*. 2015; 28:706-14.
15. Marcucci G, Maharry K, Wu YZ, Radmacher MD, Mrózek K, Margeson D, Holland KB, Whitman SP, Becker H, Schwind S, Metzeler KH, Powell BL, Carter TH, et al. IDH1 and IDH2 gene mutations identify novel molecular subsets within de novo cytogenetically normal acute myeloid leukemia: a Cancer and Leukemia Group B study. *J Clin Oncol*. 2010; 28:2348-55.
16. Tao S, Wang S, Moghaddam SJ, Ooi A, Chapman E, Wong PK, Zhang DD. Oncogenic KRAS confers chemoresistance by upregulating NRF2. *Cancer Res*. 2014; 74:7430-41.
17. Wei F, Liu Y, Bellail AC, Olson JJ, Sun SY, Lu G, Ding L, Yuan C, Wang G, Hao C. K-Ras mutation-mediated IGF-1-induced feedback ERK activation contributes to the rapalog resistance in pancreatic ductal adenocarcinomas. *Cancer Lett*. 2012; 322:58-69.
18. Réjiba S, Wack S, Aprahamian M, Hajri A. K-ras oncogene silencing strategy reduces tumor growth and enhances gemcitabine chemotherapy efficacy for pancreatic cancer treatment. *Cancer Sci*. 2007; 98:1128-36.
19. Chen S, Wang Y, Zhang Y, Wan Y. Low expression of PKC $\alpha$  and high expression of KRAS predict poor prognosis in patients with colorectal cancer. *Oncol Lett*. 2016; 12:1655-60.
20. An SJ, Huang YS, Chen ZH, Han JF, Yang JJ, Zhou Q, Xie Z, Yang Y, Yan HH, Wu YL. Lower Ras expression as an independent predictor of patient outcomes in lung cancer treated with bevacizumab plus chemotherapy. *Cancer Gene Ther*. 2014; 21:110-4.
21. Li Y, Lin J, Yang J, Qian J, Qian W, Yao DM, Deng ZQ, Liu Q, Chen XX, Xie D, An C, Tang CY. Overexpressed let-7a-3 is associated with poor outcome in acute myeloid leukemia. *Leuk Res*. 2013; 37:1642-7.
22. Zhou JD, Zhang TJ, Li XX, Ma JC, Guo H, Wen XM, Zhang W, Yang L, Yan Y, Lin J, Qian J. Epigenetic dysregulation of ID4 predicts disease progression and treatment outcome in myeloid malignancies. *J Cell Mol Med*. 2017; 21:1468-81. <https://doi.org/10.1111/jcmm.13073>.
23. Grimwade D, Hills RK, Moorman AV, Walker H, Chatters S, Goldstone AH, Wheatley K, Harrison CJ, Burnett AK; National Cancer Research Institute Adult Leukaemia Working Group. Refinement of cytogenetic classification in acute myeloid leukemia: determination of prognostic significance of rare recurring chromosomal abnormalities among 5876 younger adult patients treated in the United Kingdom Medical Research Council trials. *Blood*. 2010; 116:354-65.
24. Zhou JD, Yang L, Zhang YY, Yang J, Wen XM, Guo H, Yao DM, Ma JC, Chen Q, Lin J, Qian J. Overexpression of BAALC: clinical significance in Chinese de novo acute myeloid leukemia. *Med Oncol*. 2015; 32:386.
25. Birkeland E, Busch C, Berge EO, Geisler J, Jönsson G, Lillehaug JR, Knappskog S, Lønning PE. Low BRAF and NRAS expression levels are associated with clinical benefit from DTIC therapy and prognosis in metastatic melanoma. *Clin Exp Metastasis*. 2013; 30:867-76.
26. Ruiz-Godoy RL, Garcia-Cuellar CM, Herrera González NE, Suchil BL, Pérez-Cárdenas E, Sánchez-Pérez Y, Suárez-Roa ML, Meneses A. Mutational analysis of K-ras and Ras protein expression in larynx squamous cell carcinoma. *J Exp Clin Cancer Res*. 2006; 25:73-8.
27. Zhou JD, Yao DM, Han L, Xiao GF, Guo H, Zhang TJ, Li XX, Yuan Q, Yang L, Lin J, Qian J. Low NKD1 expression predicts adverse prognosis in cytogenetically normal acute myeloid leukemia. *Tumour Biol*. 2017; 39:1-8.
28. Lin J, Yao DM, Qian J, Chen Q, Qian W, Li Y, Yang J, Wang CZ, Chai HY, Qian Z, Xiao GF, Xu WR. Recurrent DNMT3A R882 mutations in Chinese patients with acute myeloid leukemia and myelodysplastic syndrome. *PLoS One*. 2011; 6:e26906.
29. Qian J, Yao DM, Lin J, Qian W, Wang CZ, Chai HY, Yang J, Li Y, Deng ZQ, Ma JC, Chen XX. U2AF1 mutations in Chinese patients with acute myeloid leukemia and myelodysplastic syndrome. *PLoS One*. 2012; 7:e45760.
30. Lin J, Yang J, Wen XM, Yang L, Deng ZQ, Qian Z, Ma JC, Guo H, Zhang YY, Qian W, Qian J. Detection of SRSF2-P95 mutation by high-resolution melting curve analysis and its effect on prognosis in myelodysplastic syndrome. *PLoS One*. 2014; 9:e115693.
31. Yang J, Yao DM, Ma JC, Yang L, Guo H, Wen XM, Xiao GF, Qian Z, Lin J, Qian J. The prognostic implication of SRSF2 mutations in Chinese patients with acute myeloid leukemia. *Tumour Biol*. 2016; 37:10107-14.
32. Lin J, Yao DM, Qian J, Chen Q, Qian W, Li Y, Yang J, Wang CZ, Chai HY, Qian Z, Xiao GF, Xu WR. IDH1 and IDH2 mutation analysis in Chinese patients with acute myeloid leukemia and myelodysplastic syndrome. *Ann Hematol*. 2012; 91:519-25.
33. Lin J, Qian J, Yao DM, Li Y, Yang J, Chen Q, Chai HY, Xiao GF, Xu WR. Rapid and reliable detection of IDH1

- R132 mutations in acute myeloid leukemia using high-resolution melting curve analysis. *Clin Biochem.* 2011; 44:779-83.
34. Wen XM, Lin J, Yang J, Yao DM, Deng ZQ, Tang CY, Xiao GF, Yang L, Ma JC, Hu JB, Qian W, Qian J. Double CEBPA mutations are prognostically favorable in non-APL acute myeloid leukemia patients with wild-type NPM1 and FLT3-ITD. *Int J Clin Exp Pathol.* 2014; 7:6832-40.
  35. Wen XM, Hu JB, Yang J, Qian W, Yao DM, Deng ZQ, Zhang YY, Zhu XW, Guo H, Lin J, Qian J. CEBPA methylation and mutation in myelodysplastic syndrome. *Med Oncol.* 2015; 32:192.
  36. Metzeler KH, Hummel M, Bloomfield CD, Spiekermann K, Braess J, Sauerland MC, Heinecke A, Radmacher M, Marcucci G, Whitman SP, Maharry K, Paschka P, Larson RA, et al. An 86-probe-set gene-expression signature predicts survival in cytogenetically normal acute myeloid leukemia. *Blood.* 2008; 112:4193-201.
  37. Kassambara A, Rème T, Jourdan M, Fest T, Hose D, Tarte K, Klein B. GenomicScape: an easy-to-use web tool for gene expression data analysis. Application to investigate the molecular events in the differentiation of B cells into plasma cells. *PLoS Comput Biol.* 2015; 11:e1004077.
